# Supplementary material for: Upregulated stromal EGFR and vascular remodeling in mouse xenograft models of angiogenesis inhibitor–resistant human lung adenocarcinoma
Source: JCI journal article supplement (doi:10.1172/jci42405), 2011-03-23
Supplement: sd1 [file 1]

301 Moved Permanently

# Moved Permanently

The document has moved here.
